# Supplementary material
Source: publisher site journal article supplement (https://www.dovepress.com/article/360790)
Supplement: Supplementary file 1 [file get_supplementary_file.php]

**Supplementary**

**Table 1. Potential candidate targets of Aloin for treating GC.**

| **No.** | **Gene** | **No.** | **Gene** | **No.** | **Gene** |
| --- | --- | --- | --- | --- | --- |
| 1 | *TGFBR2* | 44 | *NOS2* | 87 | *DCK* |
| 2 | *SRC* | 45 | *MAPK14* | 88 | *BMP7* |
| 3 | *NQO2* | 46 | *XIAP* | 89 | *ADAM17* |
| 4 | *NQO1* | 47 | *DAPK1* | 90 | *RHEB* |
| 5 | *HRAS* | 48 | *CCNA2* | 91 | *HMGCR* |
| 6 | *ESR1* | 49 | *CHEK1* | 92 | *ELANE* |
| 7 | *EGFR* | 50 | *HSP90AA1* | 93 | *GBA* |
| 8 | *ALDH2* | 51 | *CA9* | 94 | *CA2* |
| 9 | *AKT1* | 52 | *CTSB* | 95 | *AZGP1* |
| 10 | *ADH1B* | 53 | *DHFR* | 96 | *NR3C2* |
| 11 | *KIT* | 54 | *LGALS3* | 97 | *CDA* |
| 12 | *AR* | 55 | *RXRA* | 98 | *TNK2* |
| 13 | *PPARG* | 56 | *MMP3* | 99 | *LCK* |
| 14 | *PTGS2* | 57 | *CASP7* | 100 | *AKR1C1* |
| 15 | *GSTP1* | 58 | *EPHB4* | 101 | *ANG* |
| 16 | *CASP3* | 59 | *SERPINA1* | 102 | *REG1A* |
| 17 | *MAPK1* | 60 | *JAK3* | 103 | *ESRRG* |
| 18 | *JAK2* | 61 | *PRKACA* | 104 | *CTSK* |
| 19 | *IGF1R* | 62 | *CSNK2A1* | 105 | *HK1* |
| 20 | *FHIT* | 63 | *MIF* | 106 | *PNP* |
| 21 | *TYMS* | 64 | *F2* | 107 | *PPP5C* |
| 22 | *ESR2* | 65 | *MMP13* | 108 | *PPIA* |
| 23 | *FGFR1* | 66 | *ADH1C* | 109 | *PLA2G10* |
| 24 | *PGR* | 67 | *HSD17B1* | 110 | *SEC14L2* |
| 25 | *PLAU* | 68 | *SHBG* | 111 | *LGALS9* |
| 26 | *SOD2* | 69 | *SYK* | 112 | *GSR* |
| 27 | *TYMP* | 70 | *NOS3* | 113 | *TGM3* |
| 28 | *MMP7* | 71 | *BAG1* | 114 | *CA12* |
| 29 | *RHOA* | 72 | *PTPN1* | 115 | *MMP8* |
| 30 | *KDR* | 73 | *PDPK1* | 116 | *F10* |
| 31 | *AKT2* | 74 | *HSPA8* | 117 | *REN* |
| 32 | *TGFBR1* | 75 | *DPP4* | 118 | *ICAM2* |
| 33 | *CDK2* | 76 | *MTAP* | 119 | *CA1* |
| 34 | *MMP1* | 77 | *MAPK10* | 120 | *ABO* |
| 35 | *ALB* | 78 | *S100A9* | 121 | *GPI* |
| 36 | *IL2* | 79 | *NR1H2* | 122 | *RNASE3* |
| 37 | *MAPK8* | 80 | *FAP* | 123 | *SULT2A1* |
| 38 | *PLK1* | 81 | *MMP12* | 124 | *CMA1* |
| 39 | *IGFBP3* | 82 | *HPN* | 125 | *ADH5* |
| 40 | *GSK3B* | 83 | *PPARD* | 126 | *CRAT* |
| 41 | *PARP1* | 84 | *TTR* | 127 | *DDX6* |
| 42 | *CTSD* | 85 | *AKR1C3* | 128 | *AMD1* |
| 43 | *EPHA2* | 86 | *PIM1* | 129 | *CBR1* |

**Table 2. Clusters of target genes of Aloin against GC.**

| **Cluster** | **Score** | **Nodes** | **Edges** | **Node IDs** |
| --- | --- | --- | --- | --- |
| 1 | 18.08 | 27 | 235 | *AKT1, NOS2, ADAM17, MAPK1, HSP90AA1, MAPK14, LCK, ESR2, PGR, MMP7, AR, ESR1, MMP3, PARP1, IL2, CASP3, MAPK8, PTPN1, HRAS, MMP1, JAK2, PTGS2, SRC, IGF1R, CCNA2, NOS3, RHOA* |
| 2 | 6 | 21 | 60 | *AKT2, XIAP, PLAU, NQO1, GSK3B, F2, CDK2, HSPA8, SOD2, REN, MMP13, GSTP1, KDR, EGFR, PPARG, CHEK1, MAPK10, ALB, GSR, KIT, CASP7* |
| 3 | 3 | 3 | 3 | *ELANE, CTSB, SERPINA1* |
| 4 | 3 | 5 | 6 | *MMP8, CDA, DCK, PNP, CTSD* |
| 5 | 3 | 3 | 3 | *HSD17B1, SULT2A1, SHBG* |
| 6 | 3 | 3 | 3 | *AKR1C1, CBR1, AKR1C3* |
| 7 | 3 | 3 | 3 | *ADH1B, ALDH2, ADH1C* |

**Table 3. GO enrichment analysis on biological processes (BP) of target genes of Aloin against GC.**

| No. | BP ID | BP description | Count | Genes | *P*-Value | FDR |
| --- | --- | --- | --- | --- | --- | --- |
| 1 | GO:0018105 | peptidyl-serine phosphorylation | 14 | *GSK3B, SYK, PDPK1, SRC, PLK1, MAPK14, TGFBR1, TGFBR2, MAPK8, AKT2, CDK2, AKT1, MAPK1, PRKACA* | 1.06E-11 | 1.76E-08 |
| 2 | GO:0046777 | protein autophosphorylation | 15 | *GSK3B, SYK, DAPK1, PDPK1, SRC, EGFR, IGF1R, KIT, PIM1, KDR, AKT1, JAK2, PRKACA, EPHB4, FGFR1* | 4.66E-11 | 3.87E-08 |
| 3 | GO:0018107 | peptidyl-threonine phosphorylation | 9 | *GSK3B, MAPK8, PDPK1, CHEK1, MAPK1, AKT1, PRKACA, TGFBR1, TGFBR2* | 3.46E-10 | 1.92E-07 |
| 4 | GO:0043066 | negative regulation of apoptotic process | 20 | *NQO1, GSK3B, SRC, GSTP1, PLK1, HPN, XIAP, MIF, SOD2, EGFR, IL2, IGF1R, MAPK8, CASP3, ALB, BAG1, PIM1, KDR, AKT1, PPARD* | 1.46E-09 | 6.06E-07 |
| 5 | GO:0006468 | protein phosphorylation | 19 | *GSK3B, SYK, CSNK2A1, DAPK1, PDPK1, IGFBP3, PLK1, TGFBR1, TGFBR2, MAPK10, MAPK8, LCK, PIM1, AKT1, MAPK1, JAK2, PRKACA, JAK3, FGFR1* | 9.88E-09 | 2.87E-06 |
| 6 | GO:0043401 | steroid hormone mediated signaling pathway | 9 | *RXRA, NR1H2, ESRRG, PGR, PPARG, ESR1, BMP7, NR3C2, PPARD* | 1.04E-08 | 2.87E-06 |
| 7 | GO:0038083 | peptidyl-tyrosine autophosphorylation | 8 | *SYK, SRC, LCK, TNK2, KDR, JAK2, JAK3, IGF1R* | 1.82E-08 | 4.31E-06 |
| 8 | GO:0030574 | collagen catabolic process | 9 | *MMP12, MMP13, MMP7, MMP1, CTSK, MMP3, MMP8, CTSD, CTSB* | 2.66E-08 | 5.52E-06 |
| 9 | GO:0006508 | proteolysis | 19 | *MMP7, MMP1, HPN, MMP3, F2, MMP8, MMP12, DPP4, CASP7, ADAM17, MMP13, FAP, PLAU, CASP3, CTSK, REN, CTSD, ELANE, CTSB* | 4.05E-08 | 7.48E-06 |
| 10 | GO:0008284 | positive regulation of cell proliferation | 18 | *CSNK2A1, REG1A, AKR1C3, F2, EGFR, TGFBR1, IL2, TGFBR2, IGF1R, DPP4, AR, ADAM17, KIT, CDK2, KDR, MAPK1, HRAS, FGFR1* | 8.26E-08 | 1.37E-05 |
| 11 | GO:0022617 | extracellular matrix disassembly | 9 | *MMP12, MMP13, MMP7, MMP1, CMA1, CTSK, MMP3, MMP8, ELANE* | 1.05E-07 | 1.59E-05 |
| 12 | GO:0030335 | positive regulation of cell migration | 12 | *ADAM17, F10, PLAU, AKT2, KIT, KDR, MAPK1, JAK2, HRAS, EGFR, TGFBR1, IGF1R* | 1.50E-07 | 2.07E-05 |
| 13 | GO:0030307 | positive regulation of cell growth | 9 | *ADAM17, CSNK2A1, HPN, AKT1, F2, S100A9, EGFR, TGFBR1, IL2* | 2.31E-07 | 2.95E-05 |
| 14 | GO:0045429 | positive regulation of nitric oxide biosynthetic process | 7 | *HSP90AA1, AKT1, JAK2, SOD2, PTGS2, ESR1, EGFR* | 8.06E-07 | 9.56E-05 |
| 15 | GO:0006367 | transcription initiation from RNA polymerase II promoter | 10 | *AR, RXRA, NR1H2, ESRRG, PGR, PPARG, ESR1, ESR2, NR3C2, PPARD* | 2.30E-06 | 2.52E-04 |
| 16 | GO:0018108 | peptidyl-tyrosine phosphorylation | 10 | *HSP90AA1, SRC, KIT, KDR, JAK2, JAK3, EPHB4, EGFR, EPHA2, FGFR1* | 2.43E-06 | 2.52E-04 |
| 17 | GO:0043406 | positive regulation of MAP kinase activity | 7 | *SRC, KIT, MIF, HRAS, EGFR, ELANE, FGFR1* | 5.39E-06 | 5.27E-04 |
| 18 | GO:0001525 | angiogenesis | 11 | *GPI, SYK, FAP, NOS3, KDR, ANG, MAPK14, PTGS2, EPHB4, TYMP, FGFR1* | 7.53E-06 | 6.95E-04 |
| 19 | GO:0043627 | response to estrogen | 7 | *HSP90AA1, CA2, GBA, MAPK1, PPARG, ESR1, TGFBR2* | 9.53E-06 | 8.33E-04 |
| 20 | GO:0042127 | regulation of cell proliferation | 10 | *NOS2, PLAU, SRC, LCK, TNK2, CHEK1, KIT, XIAP, JAK2, TGFBR2* | 1.14E-05 | 9.48E-04 |
| 21 | GO:0048015 | phosphatidylinositol-mediated signaling | 8 | *PDPK1, LCK, KIT, AKT1, RHOA, EGFR, FGFR1, IGF1R* | 1.57E-05 | 0.001242 |
| 22 | GO:0007165 | signal transduction | 24 | *HSP90AA1, CSNK2A1, DAPK1, SRC, MAPK14, ESR1, EGFR, TGFBR1, ESR2, NR3C2, IGF1R, MAPK10, AR, PLAU, RHEB, AKT2, KIT, AKT1, MAPK1, PGR, PPARG, JAK2, HRAS, S100A9* | 1.80E-05 | 0.001362 |
| 23 | GO:0042493 | response to drug | 12 | *ADAM17, HSP90AA1, PNP, SRC, LCK, CASP3, CA9, PPARG, TYMS, SOD2, PTGS2, TGFBR2* | 1.97E-05 | 0.001425 |
| 24 | GO:0031659 | positive regulation of cyclin-dependent protein serine/threonine kinase activity involved in G1/S transition of mitotic cell cycle | 4 | *ADAM17, PIM1, AKT1, EGFR* | 2.30E-05 | 0.001593 |
| 25 | GO:0006915 | apoptotic process | 16 | *CSNK2A1, DAPK1, IGFBP3, XIAP, MAPK14, TGFBR1, TGFBR2, CASP7, CASP3, AKT2, BAG1, PIM1, MAPK1, JAK2, S100A9, PPARD* | 2.51E-05 | 0.001623 |
| 26 | GO:0032869 | cellular response to insulin stimulus | 7 | *PARP1, PDPK1, SRC, AKT2, GSTP1, AKT1, PPARG* | 2.54E-05 | 0.001623 |
| 27 | GO:0030168 | platelet activation | 8 | *SYK, PDPK1, SRC, LCK, MAPK1, AKT1, F2, RHOA* | 2.67E-05 | 0.001642 |
| 28 | GO:0051090 | regulation of sequence-specific DNA binding transcription factor activity | 5 | *MAPK10, MAPK8, SYK, MAPK1, MAPK14* | 3.49E-05 | 0.002001 |
| 29 | GO:0032496 | response to lipopolysaccharide | 9 | *ADAM17, CASP3, REN, LGALS9, JAK2, SOD2, PTGS2, ADH5, ELANE* | 3.49E-05 | 0.002001 |
| 30 | GO:0016477 | cell migration | 9 | *GSK3B, PDPK1, TNK2, ANG, JAK2, JAK3, RHOA, EPHA2, FGFR1* | 4.90E-05 | 0.002627 |
| 31 | GO:0001666 | response to hypoxia | 9 | *DPP4, ADAM17, NOS2, PLAU, CASP3, CA9, ANG, SOD2, TGFBR2* | 4.90E-05 | 0.002627 |
| 32 | GO:0043542 | endothelial cell migration | 5 | *DPP4, FAP, NOS3, RHOA, TGFBR1* | 6.40E-05 | 0.003298 |
| 33 | GO:0032355 | response to estradiol | 7 | *NQO1, GPI, CASP3, GSTP1, PTGS2, ESR1, BMP7* | 6.55E-05 | 0.003298 |
| 34 | GO:0006730 | one-carbon metabolic process | 5 | *CA12, DHFR, CA1, CA2, CA9* | 7.34E-05 | 0.003485 |
| 35 | GO:2000379 | positive regulation of reactive oxygen species metabolic process | 5 | *NQO2, AKR1C3, F2, MAPK14, TGFBR2* | 7.34E-05 | 0.003485 |
| 36 | GO:0010629 | negative regulation of gene expression | 8 | *NOS2, GBA, AKT1, PGR, MIF, LGALS9, HRAS, ESR1* | 8.17E-05 | 0.00377 |
| 37 | GO:0007169 | transmembrane receptor protein tyrosine kinase signaling pathway | 7 | *SYK, LCK, TNK2, KIT, KDR, EGFR, IGF1R* | 8.84E-05 | 0.003812 |
| 38 | GO:0006069 | ethanol oxidation | 4 | *ALDH2, ADH1C, ADH1B, ADH5* | 8.84E-05 | 0.003812 |
| 39 | GO:0048661 | positive regulation of smooth muscle cell proliferation | 6 | *AKT1, HMGCR, PTGS2, EGFR, ELANE, TGFBR2* | 8.95E-05 | 0.003812 |
| 40 | GO:0006809 | nitric oxide biosynthetic process | 4 | *NQO1, NOS2, NOS3, AKT1* | 1.14E-04 | 0.004747 |
| 41 | GO:0014068 | positive regulation of phosphatidylinositol 3-kinase signaling | 6 | *KIT, KDR, F2, JAK2, FGFR1, PPARD* | 1.31E-04 | 0.005321 |
| 42 | GO:0045893 | positive regulation of transcription, DNA-templated | 14 | *SRC, NR1H2, ESRRG, BMP7, ESR1, TGFBR1, ESR2, SEC14L2, CCNA2, AR, CDK2, MAPK1, PPARG, PPARD* | 1.43E-04 | 0.005667 |
| 43 | GO:0043407 | negative regulation of MAP kinase activity | 5 | *PTPN1, GSTP1, GBA, HMGCR, BMP7* | 1.52E-04 | 0.005887 |
| 44 | GO:0010628 | positive regulation of gene expression | 10 | *AR, MAPK8, HPN, GBA, KIT, LGALS9, MAPK14, HRAS, TGFBR1, PPARD* | 1.71E-04 | 0.006439 |
| 45 | GO:0060397 | JAK-STAT cascade involved in growth hormone signaling pathway | 4 | *PTPN1, MAPK1, JAK2, JAK3* | 1.80E-04 | 0.006531 |
| 46 | GO:0030855 | epithelial cell differentiation | 6 | *LGALS3, CBR1, AKR1C1, PPARG, BMP7, CTSB* | 1.87E-04 | 0.006531 |
| 47 | GO:0038128 | ERBB2 signaling pathway | 5 | *HSP90AA1, SRC, AKT1, HRAS, EGFR* | 1.89E-04 | 0.006531 |
| 48 | GO:2001237 | negative regulation of extrinsic apoptotic signaling pathway | 5 | *LGALS3, AR, SRC, GSTP1, TGFBR1* | 1.89E-04 | 0.006531 |
| 49 | GO:0071260 | cellular response to mechanical stimulus | 6 | *MAPK8, MMP7, CHEK1, AKT1, PTGS2, EGFR* | 2.00E-04 | 0.006769 |
| 50 | GO:0035556 | intracellular signal transduction | 12 | *GSK3B, SYK, PDPK1, SRC, DAPK1, AKT2, KIT, AKT1, JAK2, MAPK14, JAK3, TGFBR1* | 2.44E-04 | 0.008119 |
| 51 | GO:0014066 | regulation of phosphatidylinositol 3-kinase signaling | 6 | *LCK, KIT, MAPK1, AKT1, EGFR, FGFR1* | 3.10E-04 | 0.010111 |
| 52 | GO:0050900 | leukocyte migration | 7 | *MMP1, SRC, LCK, MIF, F2, HRAS, PPIA* | 3.28E-04 | 0.010491 |
| 53 | GO:0043410 | positive regulation of MAPK cascade | 6 | *AR, IGFBP3, KIT, KDR, HRAS, FGFR1* | 3.70E-04 | 0.011316 |
| 54 | GO:0070374 | positive regulation of ERK1 and ERK2 cascade | 8 | *NQO2, SRC, KDR, HMGCR, MIF, LGALS9, HRAS, EGFR* | 3.70E-04 | 0.011316 |
| 55 | GO:0043393 | regulation of protein binding | 4 | *SRC, PLK1, PRKACA, TGFBR1* | 3.75E-04 | 0.011316 |
| 56 | GO:0001934 | positive regulation of protein phosphorylation | 7 | *ADAM17, AKT2, KDR, AKT1, F2, HRAS, EGFR* | 4.07E-04 | 0.012082 |
| 57 | GO:0008283 | cell proliferation | 11 | *AR, SYK, SRC, PLK1, PIM1, AKT1, MIF, TYMS, HRAS, EGFR, PPARD* | 4.67E-04 | 0.013616 |
| 58 | GO:1900182 | positive regulation of protein localization to nucleus | 4 | *SRC, PLK1, AKT1, F2* | 5.09E-04 | 0.014319 |
| 59 | GO:0035902 | response to immobilization stress | 4 | *GPI, REN, PPARG, SOD2* | 5.09E-04 | 0.014319 |
| 60 | GO:0006417 | regulation of translation | 5 | *DDX6, AKT2, AKT1, TYMS, S100A9* | 6.38E-04 | 0.017662 |
| 61 | GO:0071456 | cellular response to hypoxia | 6 | *CCNA2, SRC, AKT1, PTGS2, BMP7, PPARD* | 8.07E-04 | 0.021966 |
| 62 | GO:0007173 | epidermal growth factor receptor signaling pathway | 5 | *ADAM17, PDPK1, SRC, HRAS, EGFR* | 8.46E-04 | 0.02233 |
| 63 | GO:0000165 | MAPK cascade | 9 | *PPP5C, KIT, MAPK1, JAK2, HRAS, JAK3, EGFR, IL2, FGFR1* | 8.56E-04 | 0.02233 |
| 64 | GO:0042327 | positive regulation of phosphorylation | 4 | *AR, ANG, MIF, EGFR* | 8.60E-04 | 0.02233 |
| 65 | GO:0050999 | regulation of nitric-oxide synthase activity | 4 | *HSP90AA1, NOS3, AKT1, EGFR* | 9.67E-04 | 0.024717 |
| 66 | GO:0010800 | positive regulation of peptidyl-threonine phosphorylation | 4 | *GSK3B, PLK1, MAPK1, BMP7* | 0.001082 | 0.027235 |
| 67 | GO:0060687 | regulation of branching involved in prostate gland morphogenesis | 3 | *RXRA, ESR1, BMP7* | 0.001163 | 0.028822 |
| 68 | GO:0051091 | positive regulation of sequence-specific DNA binding transcription factor activity | 6 | *KIT, AKT1, PPARG, JAK2, ESR1, ESR2* | 0.001207 | 0.029066 |
| 69 | GO:0002223 | stimulatory C-type lectin receptor signaling pathway | 6 | *SYK, PDPK1, SRC, ICAM2, PRKACA, HRAS* | 0.001207 | 0.029066 |
| 70 | GO:0050727 | regulation of inflammatory response | 5 | *CMA1, XIAP, JAK2, PTGS2, ESR1* | 0.001317 | 0.030846 |
| 71 | GO:0045909 | positive regulation of vasodilation | 4 | *NOS2, NOS3, EGFR, PPARD* | 0.001337 | 0.030846 |
| 72 | GO:0048662 | negative regulation of smooth muscle cell proliferation | 4 | *IGFBP3, ANG, PPARG, PPARD* | 0.001337 | 0.030846 |
| 73 | GO:0033574 | response to testosterone | 4 | *GPI, MTAP, GBA, CA9* | 0.001477 | 0.033206 |
| 74 | GO:0008217 | regulation of blood pressure | 5 | *NOS3, REN, PPARG, SOD2, PTGS2* | 0.001479 | 0.033206 |
| 75 | GO:0048762 | mesenchymal cell differentiation | 3 | *BMP7, TGFBR1, FGFR1* | 0.001542 | 0.03416 |
| 76 | GO:0045087 | innate immune response | 11 | *LGALS3, SYK, SRC, LCK, TNK2, ANG, PPARG, MIF, JAK2, JAK3, S100A9* | 0.001591 | 0.034439 |
| 77 | GO:0007568 | aging | 7 | *NQO1, CASP7, MMP7, AKT1, HMGCR, TYMS, TGFBR2* | 0.001597 | 0.034439 |
| 78 | GO:0071222 | cellular response to lipopolysaccharide | 6 | *MAPK8, NOS2, SRC, GSTP1, MAPK14, PPARD* | 0.001673 | 0.035628 |
| 79 | GO:0055114 | oxidation-reduction process | 13 | *NQO1, CBR1, NQO2, NOS2, NOS3, AKR1C1, GSR, AKR1C3, HMGCR, PTGS2, SOD2, DHFR, HSD17B1* | 0.001775 | 0.037066 |
| 80 | GO:0031663 | lipopolysaccharide-mediated signaling pathway | 4 | *NOS3, MAPK1, AKT1, MAPK14* | 0.001785 | 0.037066 |
| 81 | GO:0043154 | negative regulation of cysteine-type endopeptidase activity involved in apoptotic process | 5 | *GPI, CSNK2A1, SRC, XIAP, AKT1* | 0.001846 | 0.037803 |
| 82 | GO:0098869 | cellular oxidant detoxification | 5 | *GSTP1, ALB, GSR, PTGS2, S100A9* | 0.001946 | 0.037803 |
| 83 | GO:0071364 | cellular response to epidermal growth factor stimulus | 4 | *PDPK1, GSTP1, AKT1, EGFR* | 0.001953 | 0.037803 |
| 84 | GO:0007167 | enzyme linked receptor protein signaling pathway | 3 | *SYK, JAK2, JAK3* | 0.001973 | 0.037803 |
| 85 | GO:0010907 | positive regulation of glucose metabolic process | 3 | *SRC, AKT2, AKT1* | 0.001973 | 0.037803 |
| 86 | GO:0010863 | positive regulation of phospholipase C activity | 3 | *KIT, ESR1, FGFR1* | 0.001973 | 0.037803 |
| 87 | GO:0016032 | viral process | 9 | *CCNA2, HSPA8, SYK, MMP1, LCK, KDR, MAPK1, RHOA, EPHA2* | 0.00198 | 0.037803 |
| 88 | GO:0048010 | vascular endothelial growth factor receptor signaling pathway | 5 | *HSP90AA1, SRC, KDR, MAPK14, RHOA* | 0.002159 | 0.040743 |
| 89 | GO:0006935 | chemotaxis | 6 | *PLAU, MAPK1, LGALS9, MAPK14, HRAS, TYMP* | 0.002341 | 0.043695 |
| 90 | GO:0007584 | response to nutrient | 5 | *NQO1, AKR1C3, PPARG, HMGCR, TGFBR2* | 0.002386 | 0.044042 |
| 91 | GO:0090501 | RNA phosphodiester bond hydrolysis | 3 | *AZGP1, ANG, RNASE3* | 0.002454 | 0.044314 |
| 92 | GO:0019371 | cyclooxygenase pathway | 3 | *CBR1, AKR1C3, PTGS2* | 0.002454 | 0.044314 |
| 93 | GO:1900034 | regulation of cellular response to heat | 5 | *HSPA8, GSK3B, HSP90AA1, BAG1, MAPK1* | 0.002506 | 0.044762 |

**Table 4. GO enrichment analysis on cellular components (CC) of target genes of Aloin against GC.**

| No. | CC ID | CC description | Count | Genes | *P*-Value | FDR |
| --- | --- | --- | --- | --- | --- | --- |
| 1 | GO:0005829 | cytosol | 63 | *GPI, CDA, GSK3B, AMD1, HK1, CASP7, CA1, PNP, CA2, CASP3, AKT2, CHEK1, AKT1, JAK2, PRKACA, JAK3, HRAS, EPHB4, SULT2A1, CBR1, HSP90AA1, CSNK2A1, SYK, PDPK1, DCK, RHOA, TGFBR2, AR, MTAP, LCK, PPARG, S100A9, PPIA, DDX6, ADH1C, SRC, ADH1B, GSTP1, XIAP, TYMS, FHIT, ADH5, TYMP, MAPK8, HSD17B1, BAG1, MAPK1, PTPN1, NQO1, HSPA8, NOS2, NOS3, AKR1C1, PLK1, GSR, AKR1C3, MAPK14, DHFR, MAPK10, PPP5C, RHEB, CDK2, FGFR1* | 5.00E-15 | 9.20E-13 |
| 2 | GO:0070062 | extracellular exosome | 52 | *GPI, SERPINA1, REG1A, ICAM2, LGALS3, CA1, PNP, ALDH2, PLAU, CA2, LGALS9, PRKACA, CTSD, EPHB4, TGM3, CTSB, CBR1, HSP90AA1, MMP7, IGFBP3, RNASE3, MIF, F2, RHOA, MTAP, AZGP1, LCK, ANG, S100A9, PPIA, SRC, GSTP1, HPN, GBA, FHIT, ADH5, DPP4, SEC14L2, TTR, MAPK1, ELANE, NQO1, HSPA8, NQO2, AKR1C1, GSR, AKR1C3, MAPK14, SOD2, RHEB, ALB, SHBG* | 1.89E-11 | 1.74E-09 |
| 3 | GO:0005615 | extracellular space | 34 | *GPI, SERPINA1, GSTP1, GBA, EGFR, LGALS3, TTR, PLAU, CA2, CTSK, CHEK1, LGALS9, CTSD, ELANE, CTSB, HSPA8, MMP7, IGFBP3, MMP3, RNASE3, MIF, MMP8, F2, BMP7, IL2, AZGP1, MMP13, FAP, ALB, KIT, REN, ANG, S100A9, PPIA* | 1.40E-10 | 8.59E-09 |
| 4 | GO:0005576 | extracellular region | 37 | *CDA, SERPINA1, ABO, TTR, PNP, PLAU, CTSK, KDR, CTSD, EPHB4, ELANE, CTSB, HSP90AA1, MMP7, F10, MMP1, CMA1, IGFBP3, MMP3, RNASE3, MIF, MMP8, F2, BMP7, IL2, ESR2, MMP12, AZGP1, MMP13, PLA2G10, ALB, REN, ANG, SHBG, S100A9, PPIA, FGFR1* | 2.08E-10 | 9.55E-09 |
| 5 | GO:0031234 | extrinsic component of cytoplasmic side of plasma membrane | 8 | *SYK, SRC, LCK, TNK2, JAK2, JAK3, RHOA, TGM3* | 4.86E-07 | 1.79E-05 |
| 6 | GO:0045121 | membrane raft | 11 | *DPP4, ADAM17, LCK, CASP3, KDR, JAK2, CTSD, EGFR, TGFBR1, TGFBR2, HK1* | 1.95E-06 | 5.98E-05 |
| 7 | GO:0031012 | extracellular matrix | 11 | *HSPA8, LGALS3, HSP90AA1, MMP13, MMP7, MMP1, CMA1, MMP8, CTSD, S100A9, BMP7* | 4.61E-05 | 0.001211 |
| 8 | GO:0005901 | caveola | 6 | *SRC, NOS3, MAPK1, JAK2, PTGS2, TGFBR2* | 9.32E-05 | 0.001982 |
| 9 | GO:0005886 | plasma membrane | 49 | *GPI, GSK3B, ICAM2, IGF1R, LGALS3, PLAU, CA2, CASP3, AKT2, PIM1, KDR, AKT1, CA9, PRKACA, HRAS, EPHB4, HSP90AA1, CSNK2A1, SYK, PDPK1, DAPK1, F2, RHOA, TGFBR1, TGFBR2, AR, AZGP1, ADAM17, LCK, KIT, S100A9, EPHA2, SRC, GSTP1, HPN, EGFR, DPP4, CA12, PTPN1, HSPA8, F10, NOS3, TNK2, ESR1, MAPK10, PPP5C, FAP, REN, FGFR1* | 9.70E-05 | 0.001982 |
| 10 | GO:0005634 | nucleus | 59 | *GSK3B, NR3C2, LGALS3, CASP7, PNP, CASP3, AKT2, CHEK1, PIM1, KDR, AKT1, LGALS9, JAK2, PRKACA, HRAS, HSP90AA1, PARP1, CSNK2A1, SYK, IGFBP3, DCK, CCNA2, AR, MTAP, AZGP1, ANG, PPARG, PGR, S100A9, PPIA, PPARD, DDX6, SRC, GSTP1, XIAP, TYMS, PTGS2, FHIT, EGFR, SEC14L2, MAPK8, RXRA, BAG1, MAPK1, HSPA8, NOS2, NOS3, TNK2, NR1H2, PLK1, AKR1C3, ESRRG, MAPK14, ESR1, ESR2, PPP5C, ALB, CDK2, FGFR1* | 1.31E-04 | 0.002343 |
| 11 | GO:0005654 | nucleoplasm | 37 | *GPI, XIAP, TYMS, NR3C2, CASP7, MAPK8, RXRA, CASP3, AKT2, HSD17B1, CHEK1, AKT1, MAPK1, JAK2, PRKACA, HSPA8, NQO2, HSP90AA1, PARP1, CSNK2A1, PDPK1, NR1H2, PLK1, ESRRG, MIF, MAPK14, ESR1, ESR2, MAPK10, DHFR, CCNA2, AR, PPP5C, CDK2, PPARG, PGR, PPARD* | 1.40E-04 | 0.002343 |
| 12 | GO:0043235 | receptor complex | 7 | *RXRA, EGFR, TGFBR1, NR3C2, FGFR1, TGFBR2, IGF1R* | 2.76E-04 | 0.00396 |
| 13 | GO:0032587 | ruffle membrane | 6 | *ADAM17, HSP90AA1, FAP, SRC, AKT2, EPHA2* | 2.80E-04 | 0.00396 |
| 14 | GO:0005925 | focal adhesion | 11 | *DPP4, HSPA8, ADAM17, FAP, PLAU, PDPK1, MAPK1, PPIA, RHOA, EGFR, EPHA2* | 4.42E-04 | 0.00581 |
| 15 | GO:0043209 | myelin sheath | 7 | *HSPA8, GPI, HSP90AA1, CA2, ALB, MIF, SOD2* | 7.17E-04 | 0.008796 |
| 16 | GO:0009986 | cell surface | 12 | *DPP4, ADAM17, HSP90AA1, MMP7, FAP, PLAU, HPN, MIF, EGFR, TGFBR1, ELANE, EPHA2* | 0.001541 | 0.017716 |
| 17 | GO:0005737 | cytoplasm | 53 | *GPI, GSK3B, LGALS3, CASP7, CA1, PNP, CA2, CASP3, PIM1, AKT1, LGALS9, JAK2, HRAS, TGM3, SULT2A1, HSP90AA1, SYK, PDPK1, DAPK1, MIF, CCNA2, AR, MTAP, ADAM17, DDX6, SRC, GSTP1, XIAP, TYMS, PTGS2, FHIT, EGFR, SEC14L2, TTR, HSD17B1, BAG1, MAPK1, ELANE, NQO1, NQO2, NOS2, CMA1, NOS3, TNK2, NR1H2, PLK1, AKR1C3, MAPK14, ESR1, MAPK10, PPP5C, FAP, CDK2* | 0.002355 | 0.024224 |
| 18 | GO:0005739 | mitochondrion | 20 | *GSK3B, DDX6, PARP1, SRC, GSTP1, GSR, TYMS, MAPK14, SOD2, FHIT, ADH5, ESR2, HK1, MAPK10, MAPK8, AKT1, MAPK1, PRKACA, CRAT, CTSB* | 0.00237 | 0.024224 |
| 19 | GO:0043234 | protein complex | 10 | *AR, PPP5C, HSP90AA1, TTR, SYK, PARP1, ALB, MAPK1, AKT1, PTGS2* | 0.00253 | 0.024498 |

**Table 5. GO enrichment analysis on molecular functions (MF) of target genes of Aloin against GC.**

| No. | MF ID | MF description | Count | Genes | *P*-Value | FDR |
| --- | --- | --- | --- | --- | --- | --- |
| 1 | GO:0004252 | serine-type endopeptidase activity | 17 | *MMP7, F10, MMP1, CMA1, HPN, MMP3, F2, MMP8, MMP12, DPP4, MMP13, FAP, PLAU, CTSK, CTSD, ELANE, CTSB* | 9.49E-11 | 3.57E-08 |
| 2 | GO:0003707 | steroid hormone receptor activity | 10 | *AR, RXRA, NR1H2, ESRRG, PGR, PPARG, ESR1, ESR2, NR3C2, PPARD* | 3.50E-10 | 4.01E-08 |
| 3 | GO:0004713 | protein tyrosine kinase activity | 13 | *HSP90AA1, SYK, SRC, TNK2, EGFR, IGF1R, LCK, KIT, KDR, JAK2, JAK3, EPHA2, FGFR1* | 3.78E-10 | 4.01E-08 |
| 4 | GO:0016301 | kinase activity | 16 | *GSK3B, CSNK2A1, DAPK1, PDPK1, SRC, TNK2, PLK1, MAPK8, PLAU, LCK, CHEK1, CDK2, AKT1, MAPK1, JAK2, EPHA2* | 4.26E-10 | 4.01E-08 |
| 5 | GO:0005524 | ATP binding | 36 | *GSK3B, DDX6, SRC, EGFR, IGF1R, HK1, MAPK8, AKT2, CHEK1, KDR, PIM1, AKT1, MAPK1, JAK2, PRKACA, JAK3, EPHB4, HSPA8, HSP90AA1, SYK, CSNK2A1, DAPK1, PDPK1, TNK2, PLK1, MAPK14, DCK, TGFBR1, TGFBR2, MAPK10, PPP5C, LCK, KIT, CDK2, FGFR1, EPHA2* | 8.97E-10 | 6.74E-08 |
| 6 | GO:0004672 | protein kinase activity | 17 | *GSK3B, SYK, CSNK2A1, DAPK1, PDPK1, SRC, TNK2, PLK1, MAPK14, EGFR, TGFBR1, MAPK10, AKT2, CHEK1, CDK2, AKT1, JAK2* | 1.35E-08 | 8.45E-07 |
| 7 | GO:0004674 | protein serine/threonine kinase activity | 17 | *GSK3B, SYK, CSNK2A1, DAPK1, PDPK1, TNK2, PLK1, MAPK14, TGFBR1, MAPK8, AKT2, CHEK1, CDK2, PIM1, AKT1, MAPK1, PRKACA* | 2.58E-08 | 1.38E-06 |
| 8 | GO:0019899 | enzyme binding | 16 | *PTPN1, HSPA8, PARP1, SRC, PTGS2, MAPK14, ESR1, EGFR, ESR2, AR, MAPK8, RXRA, AKT1, PGR, PPARG, LGALS9* | 3.44E-08 | 1.62E-06 |
| 9 | GO:0005496 | steroid binding | 7 | *AR, ESRRG, PGR, SHBG, ESR1, ESR2, NR3C2* | 4.39E-08 | 1.83E-06 |
| 10 | GO:0008270 | zinc ion binding | 28 | *CDA, ADH1C, ADH1B, XIAP, ADH5, NR3C2, CA1, RXRA, CA2, CA9, CA12, PTPN1, MMP7, PARP1, MMP1, NR1H2, MMP3, ESRRG, MMP8, ESR1, ESR2, MMP12, AR, MMP13, PPARG, PGR, S100A9, PPARD* | 1.54E-07 | 5.79E-06 |
| 11 | GO:0004879 | RNA polymerase II transcription factor activity, ligand-activated sequence-specific DNA binding | 7 | *AR, RXRA, NR1H2, PPARG, ESR1, ESR2, PPARD* | 2.73E-07 | 9.33E-06 |
| 12 | GO:0042802 | identical protein binding | 21 | *NQO1, HSP90AA1, SERPINA1, PARP1, DAPK1, TNK2, XIAP, SOD2, FHIT, ESR1, EGFR, IGF1R, DPP4, PPP5C, TTR, LCK, ALB, AKT1, MAPK1, PPARG, FGFR1* | 8.85E-07 | 2.77E-05 |
| 13 | GO:0008144 | drug binding | 8 | *DHFR, PNP, GSTP1, ALB, PPARG, TYMS, DCK, PPARD* | 1.73E-06 | 5.00E-05 |
| 14 | GO:0005515 | protein binding | 92 | *CDA, GSK3B, SERPINA1, IGF1R, HK1, NR3C2, LGALS3, CASP7, CA1, PLAU, CA2, CASP3, AKT2, CTSK, CHEK1, PIM1, KDR, AKT1, JAK2, PRKACA, JAK3, HRAS, CTSD, EPHB4, SULT2A1, CTSB, HSP90AA1, PARP1, CSNK2A1, SYK, PDPK1, DAPK1, IGFBP3, MMP3, MIF, F2, RHOA, TGFBR1, TGFBR2, CCNA2, AR, MTAP, AZGP1, ADAM17, LCK, KIT, ANG, PPARG, PGR, S100A9, PPIA, EPHA2, PPARD, DDX6, SRC, GSTP1, HPN, GBA, XIAP, HMGCR, PTGS2, FHIT, EGFR, DPP4, MAPK8, TTR, RXRA, BAG1, MAPK1, ELANE, PTPN1, NQO1, HSPA8, NQO2, NOS2, F10, NOS3, TNK2, NR1H2, AKR1C1, PLK1, ESRRG, MAPK14, BMP7, ESR1, ESR2, MAPK10, PPP5C, FAP, ALB, CDK2, FGFR1* | 8.04E-06 | 2.16E-04 |
| 15 | GO:0004714 | transmembrane receptor protein tyrosine kinase activity | 6 | *KIT, KDR, EPHB4, EGFR, EPHA2, IGF1R* | 9.52E-06 | 2.39E-04 |
| 16 | GO:0005102 | receptor binding | 13 | *NOS2, SRC, GBA, MIF, F2, DPP4, AR, REN, PGR, ANG, JAK2, JAK3, CRAT* | 1.56E-05 | 3.68E-04 |
| 17 | GO:0030235 | nitric-oxide synthase regulator activity | 4 | *HSP90AA1, AKT1, ESR1, EGFR* | 2.32E-05 | 4.90E-04 |
| 18 | GO:0004222 | Metalloendopeptidase activity | 8 | *MMP12, ADAM17, MMP13, MMP7, FAP, MMP1, MMP3, MMP8* | 2.42E-05 | 4.90E-04 |
| 19 | GO:0004715 | non-membrane spanning protein tyrosine kinase activity | 6 | *SYK, SRC, LCK, TNK2, JAK2, JAK3* | 2.48E-05 | 4.90E-04 |
| 20 | GO:0004716 | receptor signaling protein tyrosine kinase activity | 4 | *SYK, KIT, KDR, EGFR* | 4.92E-05 | 9.24E-04 |
| 21 | GO:0004175 | endopeptidase activity | 6 | *MMP12, FAP, MMP1, CMA1, MMP3, ELANE* | 5.44E-05 | 9.74E-04 |
| 22 | GO:0019903 | protein phosphatase binding | 6 | *HSP90AA1, LCK, PPARG, MAPK14, JAK3, EGFR* | 1.15E-04 | 0.001958 |
| 23 | GO:0019901 | protein kinase binding | 12 | *CCNA2, GSK3B, PTPN1, SYK, PARP1, PDPK1, RHEB, LCK, PLK1, JAK2, PRKACA, EGFR* | 1.37E-04 | 0.001978 |
| 24 | GO:0050661 | NADP binding | 5 | *DHFR, NOS2, NOS3, GSR, HMGCR* | 1.38E-04 | 0.001978 |
| 25 | GO:0016491 | oxidoreductase activity | 9 | *NQO2, ALDH2, ADH1C, ADH1B, NOS3, AKR1C1, GSR, AKR1C3, ADH5* | 1.43E-04 | 0.001978 |
| 26 | GO:0004707 | MAP kinase activity | 4 | *MAPK10, MAPK8, MAPK1, MAPK14* | 1.46E-04 | 0.001978 |
| 27 | GO:0004089 | carbonate dehydratase activity | 4 | *CA12, CA1, CA2, CA9* | 1.46E-04 | 0.001978 |
| 28 | GO:0005178 | integrin binding | 7 | *ADAM17, SYK, FAP, SRC, ICAM2, KDR, EGFR* | 1.47E-04 | 0.001978 |
| 29 | GO:0008233 | peptidase activity | 6 | *FAP, CASP3, HPN, REN, ELANE, CTSB* | 6.09E-04 | 0.00789 |
| 30 | GO:0002020 | protease binding | 6 | *DPP4, SERPINA1, FAP, CASP3, KIT, ELANE* | 0.00102649 | 0.012865 |
| 31 | GO:0004197 | cysteine-type endopeptidase activity | 5 | *CASP7, CASP3, CTSK, CTSD, CTSB* | 0.001178441 | 0.014293 |
| 32 | GO:0001948 | glycoprotein binding | 5 | *AZGP1, HSP90AA1, SERPINA1, LCK, EGFR* | 0.001493676 | 0.017551 |
| 33 | GO:0016655 | oxidoreductase activity, acting on NAD(P)H, quinone or similar compound as acceptor | 3 | *CBR1, AKR1C1, AKR1C3* | 0.001550315 | 0.017664 |
| 34 | GO:0005158 | insulin receptor binding | 4 | *PTPN1, PDPK1, SRC, IGF1R* | 0.00163895 | 0.018125 |
| 35 | GO:0005088 | Ras guanyl-nucleotide exchange factor activity | 6 | *KIT, JAK2, JAK3, EGFR, IL2, FGFR1* | 0.001828539 | 0.019644 |
| 36 | GO:0004190 | aspartic-type endopeptidase activity | 4 | *CASP7, CASP3, REN, CTSD* | 0.001967516 | 0.02055 |
| 37 | GO:0051117 | ATPase binding | 5 | *AR, LCK, NR1H2, PGR, ESR1* | 0.002409063 | 0.024481 |

**Table 6. KEGG pathways regulated by Aloin against GC.**

| No. | Pathway ID | Pathway description | Count | Genes | *P*-Value | FDR |
| --- | --- | --- | --- | --- | --- | --- |
| 1 | hsa05200 | Pathways in cancer | 28 | *GSK3B, GSTP1, XIAP, PTGS2, EGFR, IGF1R, MAPK8, RXRA, CASP3, AKT2, AKT1, MAPK1, PRKACA, HRAS, HSP90AA1, NOS2, DAPK1, MMP1, RHOA, TGFBR1, TGFBR2, MAPK10, AR, KIT, CDK2, PPARG, FGFR1, PPARD* | 4.15E-11 | 5.98E-09 |
| 2 | hsa04914 | Progesterone-mediated oocyte maturation | 13 | *HSP90AA1, PLK1, MAPK14, IGF1R, MAPK10, CCNA2, MAPK8, AKT2, CDK2, AKT1, MAPK1, PGR, PRKACA* | 8.93E-09 | 5.27E-07 |
| 3 | hsa04917 | Prolactin signaling pathway | 12 | *MAPK10, GSK3B, MAPK8, SRC, AKT2, MAPK1, AKT1, JAK2, MAPK14, HRAS, ESR1, ESR2* | 1.10E-08 | 5.27E-07 |
| 4 | hsa04068 | FoxO signaling pathway | 15 | *PDPK1, PLK1, MAPK14, SOD2, EGFR, TGFBR1, TGFBR2, IGF1R, MAPK10, MAPK8, AKT2, CDK2, AKT1, MAPK1, HRAS* | 1.90E-08 | 6.84E-07 |
| 5 | hsa05215 | Prostate cancer | 12 | *GSK3B, AR, HSP90AA1, PDPK1, AKT2, CDK2, MAPK1, AKT1, HRAS, EGFR, FGFR1, IGF1R* | 1.10E-07 | 3.16E-06 |
| 6 | hsa04151 | PI3K-Akt signaling pathway | 21 | *GSK3B, HSP90AA1, SYK, NOS3, PDPK1, EGFR, IL2, IGF1R, RXRA, RHEB, AKT2, KIT, CDK2, KDR, AKT1, MAPK1, JAK2, HRAS, JAK3, EPHA2, FGFR1* | 3.50E-07 | 7.69E-06 |
| 7 | hsa04915 | Estrogen signaling pathway | 12 | *HSPA8, HSP90AA1, SRC, NOS3, AKT2, MAPK1, AKT1, PRKACA, HRAS, ESR1, ESR2, EGFR* | 3.74E-07 | 7.69E-06 |
| 8 | hsa05210 | Colorectal cancer | 10 | *MAPK10, GSK3B, MAPK8, AKT2, CASP3, MAPK1, AKT1, RHOA, TGFBR1, TGFBR2* | 4.55E-07 | 7.77E-06 |
| 9 | hsa05205 | Proteoglycans in cancer | 16 | *PDPK1, SRC, MAPK14, ESR1, RHOA, EGFR, IGF1R, PLAU, CASP3, AKT2, KDR, AKT1, MAPK1, PRKACA, HRAS, FGFR1* | 4.85E-07 | 7.77E-06 |
| 10 | hsa05145 | Toxoplasmosis | 12 | *MAPK10, HSPA8, MAPK8, NOS2, PDPK1, AKT2, CASP3, MAPK1, XIAP, AKT1, JAK2, MAPK14* | 1.09E-06 | 1.57E-05 |
| 11 | hsa04520 | Adherens junction | 10 | *PTPN1, CSNK2A1, SRC, MAPK1, RHOA, EGFR, TGFBR1, FGFR1, TGFBR2, IGF1R* | 1.48E-06 | 1.94E-05 |
| 12 | hsa04370 | VEGF signaling pathway | 9 | *SRC, NOS3, AKT2, KDR, MAPK1, AKT1, MAPK14, PTGS2, HRAS* | 4.50E-06 | 5.40E-05 |
| 13 | hsa04380 | Osteoclast differentiation | 12 | *MAPK10, MAPK8, SYK, LCK, AKT2, CTSK, MAPK1, AKT1, PPARG, MAPK14, TGFBR1, TGFBR2* | 6.16E-06 | 6.83E-05 |
| 14 | hsa04910 | Insulin signaling pathway | 12 | *MAPK10, GSK3B, PTPN1, MAPK8, PDPK1, RHEB, AKT2, MAPK1, AKT1, PRKACA, HRAS, HK1* | 1.02E-05 | 9.90E-05 |
| 15 | hsa04664 | Fc epsilon RI signaling pathway | 9 | *MAPK10, MAPK8, SYK, PDPK1, AKT2, MAPK1, AKT1, MAPK14, HRAS* | 1.03E-05 | 9.90E-05 |
| 16 | hsa04014 | Ras signaling pathway | 15 | *RHOA, EGFR, IGF1R, MAPK10, MAPK8, AKT2, KIT, PLA2G10, KDR, AKT1, MAPK1, PRKACA, HRAS, EPHA2, FGFR1* | 1.14E-05 | 1.03E-04 |
| 17 | hsa04919 | Thyroid hormone signaling pathway | 11 | *GSK3B, RXRA, PDPK1, RHEB, SRC, AKT2, MAPK1, AKT1, PRKACA, HRAS, ESR1* | 1.22E-05 | 1.04E-04 |
| 18 | hsa04071 | Sphingolipid signaling pathway | 11 | *MAPK10, MAPK8, PDPK1, NOS3, AKT2, MAPK1, AKT1, MAPK14, HRAS, CTSD, RHOA* | 1.78E-05 | 1.43E-04 |
| 19 | hsa04510 | Focal adhesion | 14 | *GSK3B, PDPK1, SRC, XIAP, RHOA, EGFR, IGF1R, MAPK10, MAPK8, AKT2, KDR, AKT1, MAPK1, HRAS* | 1.98E-05 | 1.49E-04 |
| 20 | hsa05152 | Tuberculosis | 13 | *SYK, NOS2, SRC, MAPK14, RHOA, MAPK10, MAPK8, CASP3, AKT2, AKT1, MAPK1, JAK2, CTSD* | 2.07E-05 | 1.49E-04 |
| 21 | hsa05223 | Non-small cell lung cancer | 8 | *RXRA, PDPK1, AKT2, MAPK1, AKT1, FHIT, HRAS, EGFR* | 2.53E-05 | 1.69E-04 |
| 22 | hsa04660 | T cell receptor signaling pathway | 10 | *GSK3B, PDPK1, LCK, AKT2, MAPK1, AKT1, MAPK14, HRAS, RHOA, IL2* | 2.58E-05 | 1.69E-04 |
| 23 | hsa05142 | Chagas disease (American trypanosomiasis) | 10 | *MAPK10, MAPK8, NOS2, AKT2, MAPK1, AKT1, MAPK14, TGFBR1, IL2, TGFBR2* | 3.54E-05 | 2.22E-04 |
| 24 | hsa05219 | Bladder cancer | 7 | *MMP1, SRC, DAPK1, MAPK1, HRAS, EGFR, TYMP* | 3.95E-05 | 2.34E-04 |
| 25 | hsa04010 | MAPK signaling pathway | 15 | *HSPA8, MAPK14, EGFR, TGFBR1, TGFBR2, MAPK10, PPP5C, MAPK8, CASP3, AKT2, AKT1, MAPK1, PRKACA, HRAS, FGFR1* | 4.07E-05 | 2.34E-04 |
| 26 | hsa05160 | Hepatitis C | 11 | *MAPK10, GSK3B, MAPK8, RXRA, PDPK1, AKT2, MAPK1, AKT1, MAPK14, HRAS, EGFR* | 4.37E-05 | 2.37E-04 |
| 27 | hsa04668 | TNF signaling pathway | 10 | *MAPK10, CASP7, MAPK8, AKT2, CASP3, MMP3, MAPK1, AKT1, MAPK14, PTGS2* | 4.44E-05 | 2.37E-04 |
| 28 | hsa05230 | Central carbon metabolism in cancer | 8 | *AKT2, KIT, MAPK1, AKT1, HRAS, EGFR, FGFR1, HK1* | 6.11E-05 | 3.14E-04 |
| 29 | hsa04012 | ErbB signaling pathway | 9 | *MAPK10, GSK3B, MAPK8, SRC, AKT2, MAPK1, AKT1, HRAS, EGFR* | 6.35E-05 | 3.15E-04 |
| 30 | hsa05212 | Pancreatic cancer | 8 | *MAPK10, MAPK8, AKT2, MAPK1, AKT1, EGFR, TGFBR1, TGFBR2* | 6.75E-05 | 3.24E-04 |
| 31 | hsa05161 | Hepatitis B | 11 | *MAPK10, CCNA2, MAPK8, SRC, AKT2, CASP3, CDK2, MAPK1, AKT1, HRAS, TGFBR1* | 9.11E-05 | 4.23E-04 |
| 32 | hsa04722 | Neurotrophin signaling pathway | 10 | *MAPK10, GSK3B, MAPK8, PDPK1, AKT2, MAPK1, AKT1, MAPK14, HRAS, RHOA* | 1.09E-04 | 4.83E-04 |
| 33 | hsa04015 | Rap1 signaling pathway | 13 | *SRC, MAPK14, RHOA, EGFR, IGF1R, AKT2, KIT, KDR, AKT1, MAPK1, HRAS, EPHA2, FGFR1* | 1.11E-04 | 4.83E-04 |
| 34 | hsa05213 | Endometrial cancer | 7 | *GSK3B, PDPK1, AKT2, MAPK1, AKT1, HRAS, EGFR* | 1.55E-04 | 6.57E-04 |
| 35 | hsa05133 | Pertussis | 8 | *MAPK10, CASP7, MAPK8, NOS2, CASP3, MAPK1, MAPK14, RHOA* | 1.69E-04 | 6.96E-04 |
| 36 | hsa05231 | Choline metabolism in cancer | 9 | *MAPK10, MAPK8, PDPK1, RHEB, AKT2, MAPK1, AKT1, HRAS, EGFR* | 1.83E-04 | 7.32E-04 |
| 37 | hsa05221 | Acute myeloid leukemia | 7 | *AKT2, KIT, PIM1, MAPK1, AKT1, HRAS, PPARD* | 2.35E-04 | 9.15E-04 |
| 38 | hsa04931 | Insulin resistance | 9 | *MAPK10, GSK3B, PTPN1, MAPK8, PDPK1, NOS3, NR1H2, AKT2, AKT1* | 2.91E-04 | 0.001102 |
| 39 | hsa04550 | Signaling pathways regulating pluripotency of stem cells | 10 | *GSK3B, AKT2, MAPK1, AKT1, JAK2, MAPK14, HRAS, JAK3, FGFR1, IGF1R* | 3.52E-04 | 0.001298 |
| 40 | hsa05222 | Small cell lung cancer | 8 | *RXRA, NOS2, AKT2, CDK2, XIAP, AKT1, PTGS2, FHIT* | 3.69E-04 | 0.001315 |
| 41 | hsa05203 | Viral carcinogenesis | 12 | *CCNA2, SYK, SRC, CASP3, HPN, CHEK1, CDK2, MAPK1, PRKACA, HRAS, JAK3, RHOA* | 3.74E-04 | 0.001315 |
| 42 | hsa04912 | GnRH signaling pathway | 8 | *MAPK10, MAPK8, SRC, MAPK1, MAPK14, PRKACA, HRAS, EGFR* | 5.60E-04 | 0.001921 |
| 43 | hsa05120 | Epithelial cell signaling in Helicobacter pylori infection | 7 | *MAPK10, ADAM17, MAPK8, SRC, CASP3, MAPK14, EGFR* | 6.28E-04 | 0.002102 |
| 44 | hsa05169 | Epstein-Barr virus infection | 9 | *MAPK10, CCNA2, MAPK8, SYK, AKT2, CDK2, AKT1, MAPK14, JAK3* | 6.62E-04 | 0.002168 |
| 45 | hsa04066 | HIF-1 signaling pathway | 8 | *NOS2, NOS3, AKT2, MAPK1, AKT1, EGFR, IGF1R, HK1* | 7.73E-04 | 0.002475 |
| 46 | hsa05218 | Melanoma | 7 | *AKT2, MAPK1, AKT1, HRAS, EGFR, FGFR1, IGF1R* | 8.56E-04 | 0.00268 |
| 47 | hsa04611 | Platelet activation | 9 | *SYK, SRC, NOS3, AKT2, MAPK1, AKT1, MAPK14, PRKACA, RHOA* | 0.00100651 | 0.003084 |
| 48 | hsa00980 | Metabolism of xenobiotics by cytochrome P450 | 7 | *CBR1, ADH1C, ADH1B, GSTP1, AKR1C1, ADH5, SULT2A1* | 0.00106563 | 0.003197 |
| 49 | hsa05162 | Measles | 9 | *HSPA8, GSK3B, CSNK2A1, AKT2, CDK2, AKT1, JAK2, JAK3, IL2* | 0.001167561 | 0.003431 |
| 50 | hsa05204 | Chemical carcinogenesis | 7 | *CBR1, ADH1C, ADH1B, GSTP1, PTGS2, ADH5, SULT2A1* | 0.001601099 | 0.004611 |
| 51 | hsa05166 | HTLV-I infection | 12 | *GSK3B, LCK, AKT2, CHEK1, XIAP, AKT1, PRKACA, HRAS, JAK3, TGFBR1, IL2, TGFBR2* | 0.002183583 | 0.006165 |
| 52 | hsa00910 | Nitrogen metabolism | 4 | *CA12, CA1, CA2, CA9* | 0.002238516 | 0.006199 |
| 53 | hsa04062 | Chemokine signaling pathway | 10 | *GSK3B, SRC, AKT2, MAPK1, AKT1, JAK2, PRKACA, HRAS, JAK3, RHOA* | 0.002648529 | 0.007196 |
| 54 | hsa04152 | AMPK signaling pathway | 8 | *CCNA2, PDPK1, RHEB, AKT2, AKT1, PPARG, HMGCR, IGF1R* | 0.003251284 | 0.00867 |
| 55 | hsa05214 | Glioma | 6 | *AKT2, MAPK1, AKT1, HRAS, EGFR, IGF1R* | 0.003537297 | 0.009261 |
